# Supplementary material
Source: PubMed Central journal article supplement (PMC4631683)
Supplement: NIHMS730282-supplement-ESM_Fig__3.pdf [file NIHMS730282-supplement-ESM_Fig__3.pdf]

ESM Fig. 3.

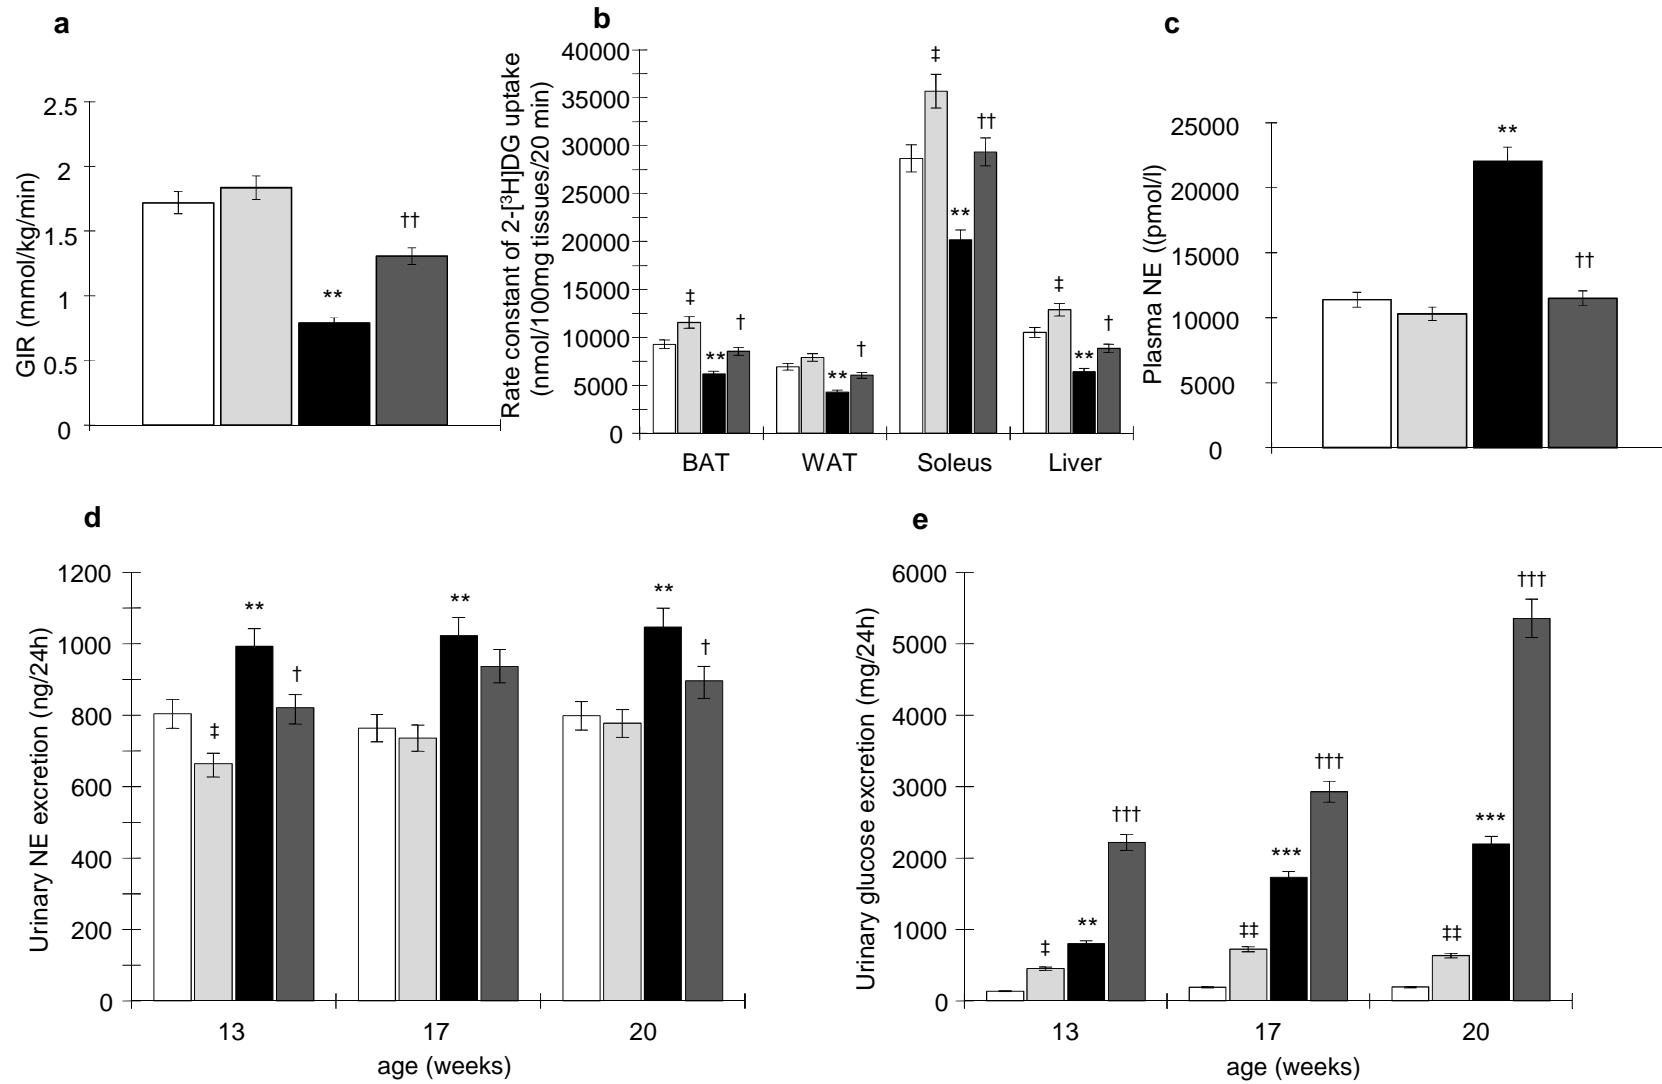

**ESM Fig. 3.** Hyperinsulinemic-euglycemic clamp study, *in vivo* glucose uptake, plasma NE content, urine NE and glucose excretion in the pre-diabetic stage. **a**, OLETF rats show a markedly lowered glucose infusion rate (GIR) during the hyperinsulinemic-euglycemic clamp study compared with LETO rats, which was increased by RDX in OLETF rats. **b**, During rate constant of net tissue uptake of 2-[<sup>3</sup>H]Deoxy-D-Glucose measurement, OLETF rats showed decreased glucose uptake in brown adipose tissues (BAT), white adipose tissues (WAT), soleus muscles and liver tissues compared with LETO rats. RDX increased glucose uptake by these tissues. **c**, **d**, OLETF rats show elevated plasma NE levels (**c**) and increased excretion of urine NE (**d**) compared with LETO rats. RDX suppresses plasma NE contents and attenuates urine NE excretion. **e**, OLETF rats showed increased urine glucose excretion compared LETO rats. Renal denervated OLETF rats show markedly increased urine glucose excretion compared with non-denervated OLETF rats. \*\* $p < 0.01$ , \*\*\* $p < 0.005$  LETO vs. OLETF; † $p < 0.05$ , †† $p < 0.01$ , ††† $p < 0.005$  OLETF vs. OLETF+RDX; ‡ $p < 0.05$ , ‡‡ $p < 0.01$  vs. LETO+RDX. White bars represent LETO group. Black bars represent OLETF group. Light grey bar represent LETO+RDX. Dark grey bar represent OLETF+RDX.
