# Supplementary material
Source: PubMed Central journal article supplement (PMC4631683)
Supplement: NIHMS730282-supplement-ESM_Table_1.pdf [file NIHMS730282-supplement-ESM_Table_1.pdf]

**ESM Table 1.** The rat oligonucleotide primer sequences for real-time RT-PCR (*in vivo* studies).

| Name           |           | Primer Sequences        |
|----------------|-----------|-------------------------|
| <i>Glut1</i>   | sense     | CTGTTGGCCTTTGTGTCTGC    |
|                | antisense | GTCAGGCCACAGTACACTCC    |
| <i>Glut2</i>   | sense     | ACCAGCACATACGACACCAG    |
|                | antisense | ACCATTCCGCCTACTGCAAA    |
| <i>Glut4</i>   | sense     | CCTTTGCACACCACTTCCGA    |
|                | antisense | AGAGCCGATCTGCTGGAAAC    |
| <i>Sgt1</i>    | sense     | TCTTCGCTATCAGCGTCGTC    |
|                | antisense | TGCGCTCTTCTGTGCTGTTA    |
| <i>Sgt2</i>    | sense     | GACATTCTGGTCATTGCCGC    |
|                | antisense | CTGCCAAGAAGTAGCCACCA    |
| $\beta$ -actin | sense     | ACAACCTTCTTGCAGCTCCTCCG |
|                | antisense | ACGAGCGCAGCGATATCGTC    |

*Glut1*, glucose transporter 1; *Glut2*, glucose transporter 2; *Glut4*, glucose transporter 4; *Sgt1*, sodium dependent glucose transporter 1; *Sgt2*, sodium dependent glucose transporter 2.
