# Supplementary material
Source: PubMed Central journal article supplement (PMC4631683)
Supplement: NIHMS730282-supplement-ESM_Table_2.pdf [file NIHMS730282-supplement-ESM_Table_2.pdf]

**ESM Table 2.** The human oligonucleotide primer sequences for real-time RT-PCR (*in vitro* studies).

| Name           |           | Primer Sequences         |
|----------------|-----------|--------------------------|
| <i>GLUT1</i>   | sense     | GCCTGGATCTCCCCACTCTA     |
|                | antisense | CAGTGCTCCCAACTGGTCTC     |
| <i>GLUT2</i>   | sense     | TCCAGCTACCGACAGCCTAT     |
|                | antisense | GCTGATACCAGCCGTCTGAA     |
| <i>SGLT1</i>   | sense     | AGCAGACTTGTGTGGAAGCA     |
|                | antisense | GGGAGGCTCCAATCTCATGT     |
| <i>SGLT2</i>   | sense     | CTGGTCATTGGCGTTGGCTT     |
|                | antisense | ATGTTGCTGGCGAAGAGAGAG    |
| $\beta$ -actin | sense     | CACAGAGCCTCGCCTTTGCCGATC |
|                | antisense | ACGAGCGCGGCGATATCATCATC  |

*GLUT1*, glucose transporter 1; *GLUT2*, glucose transporter 2; *SGLT1*, sodium dependent glucose transporter 1; *SGLT2*, sodium dependent glucose transporter 2.
